# Supplementary material
Source: ML conference proceedings conference paper supplement (https://proceedings.mlr.press/v32/abbasi-yadkori14.html)
Supplement: Supplementary file 1 [file abbasi-yadkori14-supp.pdf]

## A. Proofs

*Proof of Lemma 3.* Consider the Bellman equation

$$\lambda + V_{\pi, \ell}(x, a) = \ell(x, a) + V_{\pi, \ell}(Ax + Ba, \pi(Ax + Ba)) .$$

We prove the lemma by showing that the given quadratic form is the unique solution of the Bellman equation.

Let  $z = (x \ a)$  and

$$z' = \begin{pmatrix} Ax + Ba \\ -K(Ax + Ba) + c \end{pmatrix} = \begin{pmatrix} I \\ -K \end{pmatrix} (A \ B) \begin{pmatrix} x \\ a \end{pmatrix} + \begin{pmatrix} 0 \\ c \end{pmatrix} .$$

We guess a quadratic form for the value functions and write

$$\lambda + z^\top Pz + L^\top z = (x - g_*)^\top Q(x - g_*) + a^\top a + z'^\top Pz' + L^\top z' .$$

The above equation has a solution if

$$P = \begin{pmatrix} P_{11} & P_{12} \\ P_{21} & P_{22} \end{pmatrix} = \begin{pmatrix} A^\top \\ B^\top \end{pmatrix} (I \ -K^\top) P \begin{pmatrix} I \\ -K \end{pmatrix} (A \ B) + \begin{pmatrix} Q & 0 \\ 0 & I \end{pmatrix} , \quad (11)$$

and

$$L^\top = (L_1^\top \ L_2^\top) = (L^\top + 2(0 \ c^\top) P) \begin{pmatrix} I \\ -K \end{pmatrix} (A \ B) - (2g_*^\top Q \ 0) , \quad (12)$$

and

$$\lambda = g_*^\top Qg_* + c^\top P_{22}c + L_2^\top c .$$

We have that

$$\left\| (A \ B) \begin{pmatrix} I \\ -K \end{pmatrix} \right\| = \|A - BK\| < 1 .$$

This implies that iterative equations (11) and (12) have a unique solution. Thus, the quadratic form is the solution of the Bellman equation.  $\square$

*Proof of Lemma 4.* From Lemma 3, we have that

$$P_t = \begin{pmatrix} A^\top \\ B^\top \end{pmatrix} (I \ -K_t^\top) P_t \begin{pmatrix} I \\ -K_t \end{pmatrix} (A \ B) + \begin{pmatrix} Q & 0 \\ 0 & I \end{pmatrix}$$

and

$$L_t^\top = (L_t^\top + 2(0 \ c_t^\top) P_t) \begin{pmatrix} I \\ -K_t \end{pmatrix} (A \ B) - (2g_t^\top Q \ 0) .$$

Notice that the value of  $P_t$  depends only on the values of  $A$ ,  $B$ , and  $K_t$ , which in turn, by Lemma 2, depend only on  $\{K_1, P_1, \dots, P_{t-1}\}$ . Thus, matrix  $P_t$  is determined by  $K_1$  independently of the adversarial choices  $\{g_1, \dots, g_t\}$ .

In the absence of adversarial vectors, the optimal policy has the form of  $\pi(x) = -K_*x$ , where  $K_* = (I + B^\top SB)^{-1}B^\top SA$  and  $S$  is the solution of the Riccati equation. Consider a problem where  $g_1 = g_2 = \dots = 0$ ,  $c_1 = c_2 = \dots = 0$ , and  $K_1 = K_*$  is the gain matrix of the optimal policy. Then,  $V_1$  is the value function of the optimal policy. Because  $\pi_2$  is the greedy policy with respect to  $V_1$ , it is the optimal policy and thus  $K_2$  is also the gain matrix of the optimal policy, and so  $K_2 = K_1$ . Repeating the same argument shows that all gain matrices are the same. Thus, if we choose  $K_1$  to be the optimal gain matrix in the non-adversarial problem, we will get  $K_1 = \dots = K_t$  and hence  $P_1 = P_2 = \dots = P_t$ .  $\square$

*Proof of Lemma 7.* First we prove (i). Under policy  $\pi_t(x) = -K_*x + c_t$ , we have that

$$(x_\infty^{\pi_t}, \pi_t(x_\infty^{\pi_t})) = (Ax_\infty^{\pi_t} + B\pi_t(x_\infty^{\pi_t}), \pi_t(Ax_\infty^{\pi_t} + B\pi_t(x_\infty^{\pi_t}))) .$$

Thus, by (1) and (7),

$$\begin{aligned}\lambda &= (x_\infty^{\pi_t} - g_t)^\top Q(x_\infty^{\pi_t} - g_t) + (-K_* x_\infty^{\pi_t} + c_t)^\top (-K_* x_\infty^{\pi_t} + c_t) \\ &= g_t^\top Q g_t + c_t^\top (I + B^\top (I - A + BK_*)^{-\top} (Q + K_*^\top K_*) (I - A + BK_*)^{-1} B) c_t \\ &\quad + 2(-g_t^\top Q - c_t^\top K_*) (I - A + BK_*)^{-1} B c_t.\end{aligned}$$

Then (5) implies that

$$\begin{aligned}L_{t,2}^\top &= 2(-g_t^\top Q - c_t^\top K_*) (I - A + BK_*)^{-1} B, \\ P_{*,22} &= I + B^\top (I - A + BK_*)^{-\top} (Q + K_*^\top K_*) (I - A + BK_*)^{-1} B.\end{aligned}$$

By Lemmas 2 and 4,  $c_t = -\frac{1}{2} P_{*,22}^{-1} \left( \frac{1}{t-1} \sum_{s=1}^{t-1} L_{s,2} \right)$ . Thus,

$$\begin{aligned}c_t &= -P_{*,22}^{-1} \left( \frac{1}{t-1} \sum_{s=1}^{t-1} L_{s,2} \right) \\ &= -\frac{P_{*,22}^{-1} B^\top}{t-1} (I - A + BK_*)^{-\top} \sum_{s=1}^{t-1} (-Q g_s - K_*^\top c_s) \\ &= \frac{1}{t-1} \left( D \sum_{s=1}^{t-1} g_s + H \sum_{s=1}^{t-1} c_s \right),\end{aligned}\tag{13}$$

where  $H = P_{*,22}^{-1} B^\top (I - A + BK_*)^{-\top} K_*^\top$ . To obtain a bound on  $\max_t \|c_t\|$  from the above equation, we need to show that  $\|H\|$  is sufficiently smaller than one. Let  $N = (I - A + BK_*)^{-1}$ ,  $M = K_* N B$ , and  $L = (I + M^\top M)^{-1} M^\top$ . We have that

$$\begin{aligned}H &= (I + B^\top N^\top (Q + K_*^\top K_*) N B)^{-1} M^\top \\ &< (I + B^\top N^\top K_*^\top K_* N B)^{-1} M^\top \\ &= (I + M^\top M)^{-1} M^\top \\ &= L,\end{aligned}\tag{14}$$

and

$$\begin{aligned}LL^\top &= (I + M^\top M)^{-1} M^\top M (I + M^\top M)^{-1} \\ &= (I + M^\top M)^{-1} (M^\top M + I - I) (I + M^\top M)^{-1} \\ &= (I + M^\top M)^{-1} (I - (I + M^\top M)^{-1}).\end{aligned}$$

Because  $\|M^\top M\| = \lambda_{\max}(M^\top M)$ ,  $\|N\| \leq 1/(1-\rho)$ , and  $\|M^\top M\| \leq \|K_*\|^2 \|B\|^2 / (1-\rho)^2$ , we get that

$$\begin{aligned}\|LL^\top\| &\leq \|(I + M^\top M)^{-1}\| \|I - (I + M^\top M)^{-1}\| \\ &\leq 1 - \frac{1}{1 + \|M^\top M\|} \\ &\leq 1 - \frac{1}{1 + \|K_*\|^2 \|B\|^2 / (1-\rho)^2} \\ &= \frac{\|K_*\|^2 \|B\|^2 / (1-\rho)^2}{1 + \|K_*\|^2 \|B\|^2 / (1-\rho)^2}.\end{aligned}$$

By (14) and the above inequality, we get that

$$\begin{aligned}\|H\| &\leq \|L\| = \|L^\top\| = \sqrt{\lambda_{\max}(LL^\top)} = \sqrt{\|LL^\top\|} \\ &\leq \frac{\|K_*\| \|B\| / (1-\rho)}{\sqrt{1 + \|K_*\|^2 \|B\|^2 / (1-\rho)^2}}.\end{aligned}$$

Let  $v = 1/(1 - \|H\|)$ . We get that

$$\begin{aligned}
 v &\leq \frac{1}{1 - \frac{\|K_*\| \|B\| / (1-\rho)}{\sqrt{1 + \|K_*\|^2 \|B\|^2 / (1-\rho)^2}}} \\
 &= \frac{\sqrt{1 + \|K_*\|^2 \|B\|^2 / (1-\rho)^2}}{\sqrt{1 + \|K_*\|^2 \|B\|^2 / (1-\rho)^2} - \|K_*\| \|B\| / (1-\rho)} \\
 &= \sqrt{1 + \|K_*\|^2 \|B\|^2 / (1-\rho)^2} \left( \sqrt{1 + \|K_*\|^2 \|B\|^2 / (1-\rho)^2} + \frac{\|K_*\| \|B\|}{1-\rho} \right) \\
 &= H' .
 \end{aligned}$$

Now we are ready to bound  $\|c_t\|$ . By (13), we get that for any  $t \geq 1$ ,

$$\|c_t\| \leq \|D\| G + \frac{1}{t-1} \sum_{s=1}^{t-1} \|c_s\| \leq \|D\| G + \|H\| \max_{s \geq 1} \|c_s\| .$$

Thus,  $\max_{t \geq 1} \|c_t\| \leq \|D\| G + \|H\| \max_{t \geq 1} \|c_t\|$  and thus,  $\max_{t \geq 1} \|c_t\| \leq \frac{\|D\| G}{1 - \|H\|} \leq \|D\| G H' = C$ .

Proof of (ii). First we write  $c_t$  in terms of  $c_{t-1}$ :

$$\begin{aligned}
 c_t &= \frac{1}{t-1} \left( D \sum_{s=1}^{t-1} g_s + H \sum_{s=1}^{t-1} c_s \right) \\
 &= \frac{Dg_{t-1}}{t-1} + \frac{Hc_{t-1}}{t-1} + \frac{t-2}{t-1} \left( \frac{D}{t-2} \sum_{s=1}^{t-2} g_s + \frac{H}{t-2} \sum_{s=1}^{t-2} c_s \right) \\
 &= \frac{Dg_{t-1}}{t-1} + \frac{Hc_{t-1}}{t-1} + \frac{t-2}{t-1} c_{t-1} \\
 &= \frac{1}{t-1} (Dg_{t-1} + ((t-2)I + H)c_{t-1}) .
 \end{aligned}$$

This implies that  $c_t - c_{t-1} = \frac{1}{t-1} (Dg_{t-1} - (I - H)c_{t-1})$ . Then we use the facts that  $\|c_t\| \leq C$  and  $\|H\| < 1$  to obtain

$$\|c_t - c_{t-1}\| \leq \frac{\|D\| G + 2C}{t-1} .$$

□

*Proof of Lemma 8.* Let  $f^\pi : \mathcal{X} \rightarrow \mathcal{X}$  be the transition function under policy  $\pi = (K, c)$ , i.e.  $f^\pi(x) = (A - BK)x + Bc$ . Let  $\epsilon_{k,t} = \|x_k - x_\infty^{\pi_t}\|$  and  $\epsilon_t = \|x_t - x_\infty^{\pi_t}\|$  denote the difference between the state variable and the limiting state under the chosen policy. We write<sup>4</sup>

$$\begin{aligned}
 \epsilon_{k,t} &= \|f^{\pi_k}(x_{k-1}) - f^{\pi_t}(x_{k-1}) + f^{\pi_t}(x_{k-1}) - x_\infty^{\pi_t}\| \\
 &\leq \|f^{\pi_k}(x_{k-1}) - f^{\pi_t}(x_{k-1})\| + \|f^{\pi_t}(x_{k-1}) - x_\infty^{\pi_t}\| .
 \end{aligned}$$

From this decomposition, we get that

$$\begin{aligned}
 \epsilon_{k,t} &\leq \|B\| \|c_k - c_t\| + \|f^{\pi_t}(x_{k-1}) - x_\infty^{\pi_t}\| \\
 &\leq \|B\| \|c_k - c_t\| + \rho \|x_{k-1} - x_\infty^{\pi_t}\| \\
 &\leq \|B\| (\|D\| G + 2C) \sum_{s=k}^{t-1} \frac{1}{s} + \rho \|x_{k-1} - x_\infty^{\pi_t}\| .
 \end{aligned}$$

<sup>4</sup>A similar decomposition, but with a different norm, was used in (Even-Dar et al., 2009, proof of Lemma 5.2.) to bound the difference between the stationary distribution of the chosen policy and the distribution of the state variable in a finite MDP problem.

Thus,

$$\begin{aligned}
 \epsilon_t &\leq \|B\| (\|D\| G + 2C) \sum_{k=1}^t \rho^{t-k} \sum_{s=k}^{t-1} \frac{1}{s} + \rho^{t-1} \|x_1 - x_\infty^\pi\| \\
 &= \|B\| (\|D\| G + 2C) \sum_{s=1}^{t-1} \frac{1}{t-s} \sum_{k=s}^{t-1} \rho^k + \rho^{t-1} \frac{\|B\| C}{1-\rho} \\
 &\leq \frac{\|B\| (\|D\| G + 2C)}{1-\rho} \sum_{s=1}^{t-1} \frac{\rho^s}{t-s} + \rho^{t-1} \frac{\|B\| C}{1-\rho},
 \end{aligned}$$

where the second step follows from Equation (7), Lemma 7, and the fact that  $x_1 = 0$ . If  $t > \lceil \log(T-1)/\log(1/\rho) \rceil$ , we get that

$$\begin{aligned}
 \sum_{s=1}^{t-1} \frac{\rho^s}{t-s} &= \sum_{s:\rho^s \leq 1/(t-1)} \frac{\rho^s}{t-s} + \sum_{s:1>\rho^s>1/(t-1)} \frac{\rho^s}{t-s} \\
 &\leq \frac{1}{t-1} \sum_{s=1}^{t-1} \frac{1}{t-s} + \frac{\log(t-1)}{\log(1/\rho)} \left( \frac{1}{t - \log(t-1)/\log(1/\rho)} \right) \\
 &\leq \frac{1 + \log(t-1)}{t-1} + \frac{\log(t-1)}{\log(1/\rho)} \left( \frac{1}{t - \log(t-1)/\log(1/\rho)} \right).
 \end{aligned}$$

Thus,

$$\begin{aligned}
 \epsilon_t &\leq \frac{\|B\| (\|D\| G + 2C)}{1-\rho} \left( \frac{1 + \log(t-1)}{t-1} + \frac{\log(t-1)}{\log(1/\rho)} \left( \frac{1}{t - \log(t-1)/\log(1/\rho)} \right) \right) \\
 &\quad + \rho^{t-1} \frac{\|B\| C}{1-\rho}.
 \end{aligned}$$

To prove the second part of lemma, let  $u_T = \lceil \log(T-1)/\log(1/\rho) \rceil$ . We have that

$$\sum_{t>u_T} \frac{1}{t - \log(T-1)/\log(1/\rho)} \leq \sum_{t>u_T} \frac{1}{t - u_T} \leq \sum_{t=1}^{T-u_T} \frac{1}{t} \leq \sum_{t=1}^T \frac{1}{t} \leq 1 + \log(T). \quad (15)$$

Thus, by (8) and (15),

$$\begin{aligned}
 \sum_{t=1}^T \epsilon_t &\leq \sum_{t \leq u_T} \epsilon_t + \sum_{t > u_T} \epsilon_t \\
 &\leq \frac{1}{1-\rho} \left( 4 \|B\| C \left\lceil \frac{\log T}{\log(1/\rho)} \right\rceil + \frac{\|B\| C}{1-\rho} \right. \\
 &\quad \left. + \|B\| (\|D\| G + 2C)(1 + \log T) \left( 1 + \log T + \frac{\log T}{\log(1/\rho)} \right) \right).
 \end{aligned}$$

□

The fact that all gain matrices are identical greatly simplifies the boundedness proof.

*Proof of Lemma 11.* First, it is easy to verify that  $P_{*,22} \succ I$  and thus,  $H(V_t) = P_{*,22} \succ 2I$ . The gradient of the value function can be written as

$$\nabla_a V_t(x_\infty^\pi, a) = 2P_{*,22}a + P_{*,21}x_\infty^\pi + L_{t,2}^\top.$$

Thus,  $\|\nabla_a V_t(x_\infty^\pi, a)\| \leq F$  for any  $\|a\| \leq U$ .

Proof of (i). By (8),  $\|x_t\| \leq X$ , and by Lemma 7,  $\|c_t\| \leq C$ . Thus, all actions are bounded by

$$\|a_t\| = \|-K_*x_t + c_t\| \leq \|K_*\| X + C \leq U .$$

Proof of (ii) and (iii). By Lemma 6,

$$\|-Kx_\infty^\pi + c\| \leq K'X' + C' \leq U .$$

Similarly,

$$\|-K_*x_\infty^\pi + c_t\| \leq \|K_*\| X' + C \leq U .$$

Proof of (iv). By (4) and the fact that  $K_t = K_*$  and  $P_t = P_*$ , we get that

$$\|L_t\| \leq \frac{2}{1-\rho} (G\|Q\| + \rho C \|P_*\|) .$$

Further, by (2), for any policy  $\pi \in \Pi$  and any action satisfying  $\|a\| \leq U$ , the value functions are bounded by

$$\begin{aligned} V_t(x_\infty^\pi, a) &= (x_\infty^{\pi\top} \quad a^\top) P_* \begin{pmatrix} x_\infty^\pi \\ a \end{pmatrix} + L_t^\top \begin{pmatrix} x_\infty^\pi \\ a \end{pmatrix} \\ &\leq \|P_*\| (X' + U)^2 + \frac{2}{1-\rho} (G\|Q\| + \rho C \|P_*\|) (X' + U) \\ &= V . \end{aligned}$$

□

*Proof of Lemma 13.* For policy  $\pi = (K, c)$ , we have  $\ell_t(x, \pi) = x^\top(Q + K^\top K)x - 2(c^\top K + g_t^\top Q)x + c^\top c + g_t^\top Qg_t$ . Define  $S = Q + K^\top K$  and  $d_t = 2(c^\top K + g_t^\top Q)$ . We write

$$\begin{aligned} \gamma_T &= \sum_{t=1}^T (x_\infty^{\pi\top} Sx_\infty^\pi - d_t x_\infty^\pi) - \sum_{t=1}^T (x_t^{\pi\top} Sx_t^\pi - d_t x_t^\pi) \\ &= \sum_{t=1}^T d_t (x_t^\pi - x_\infty^\pi) + \sum_{t=1}^T \left( \|S^{1/2}x_\infty^\pi\| - \|S^{1/2}x_t^\pi\| \right) \left( \|S^{1/2}x_t^\pi\| + \|S^{1/2}x_\infty^\pi\| \right) . \end{aligned}$$

Thus,

$$\begin{aligned} \gamma_T &\leq \sum_{t=1}^T d_t (x_t^\pi - x_\infty^\pi) + \sum_{t=1}^T \|S^{1/2}(x_t^\pi - x_\infty^\pi)\| \left( \|S^{1/2}x_t^\pi\| + \|S^{1/2}x_\infty^\pi\| \right) \\ &\leq \sum_{t=1}^T \left( \|d_t\| + \|S^{1/2}\| \left( \|S^{1/2}x_t^\pi\| + \|S^{1/2}x_\infty^\pi\| \right) \right) \|x_t^\pi - x_\infty^\pi\| \\ &\leq Z'_1 \sum_{t=1}^T \|x_t^\pi - x_\infty^\pi\| . \end{aligned}$$

We get the desired result by Lemma 6.

□
